# Supplementary material
Source: publisher figshare collection journal article supplement (https://tandf.figshare.com/ndownloader/files/22028334)
Supplement: Supplementary file 1 [file 22028334]

# **Appendix 1. blacklist of problematic domains signaled by debunking websites**

| tg-news24.com | ilradicale.altervista.org |
| --- | --- |
| retenews24.it | ilrisvegliodellamente.altervista.org |
| tg24-ore.com | ilsapereepotere.blogspot.it |
| notizie-24.com | ilsapereepotere2.blogspot.com |
| informazionelibera.agency | imigliorivideo.co |
| streamingneuws.com | imolaoggi.it |
| notizie-24.jimdo.com | incazzaticontrolacasta.com |
| oltrenews.com | informare.over-blog.it |
| adessobasta.org | informarexresistere.fr |
| attivo.news | informasalus.it |
| skynew.it | informatitalia.blogspot.com |
| llfatto.it | informatitalia.blogspot.it |
| 01.oltrenews.com | informazionebycuriosity.altervista.org |
| gazzettadellasera.it | informazionelibera.eu |
| larepubbica.it | internapoli.it |
| tgnews.altervista.org | ioco.altervista.org |
| inedito.net | iocritico.com |
| leggimiora.com | iovivoaroma.org |
| mondoit.info | iozummo.com |
| tg-quotidiano.com | irresponsabile.com |
| attivonews.com | italiainmovimento.it |
| conseilnational.blogspot.pe | italiani-informati.com |
| guardiegiurate.altervista.org | italianiperlapatria.info |
| howtodofor.com | italianosveglia.com |
| ilfattoinedito.com | italianotizie24.eu |
| iloveitalia.net | italiarialzati.com |
| ilvostropensiero.altervista.org | jedanews.it |
| italia.imigliori.org | jedasupport.altervista.org |
| italia24.online | jhwhinri.blogspot.it |
| koenig2099.wordpress.com | kevideo.eu |
| leggiora.info | lacucinasiciliana.altervista.org |
| mondodiannunci.com | laleva.org |
| notiziarioonline360.com | lanozione.com |
| notiziarioromacapitale.blogspot.com | lapillolarossa15.altervista.org |
| peoplehavethepower.altervista.org | larepubbica.it |
| retenews24.net | larepubblica.info |
| sadefenza.blogspot.com | lastella.altervista.org |
| siviaggia.it | lastnews24h.com |
| verodonna.it | last-webs.com |
| interagisco.net | laveritadininconaco.altervista.org |
| italiapatriamia.eu | liberamenteservo.com |
| kontrokultura.it | liberogiornale.com |
| lastampatv.it | libero-notizie.com |
| lonesto.it | libreidee.org |
| mole24.it | linktoday.it |
| noidelsud.com | livewebit.com |
| nonguardarlo.com | lolandesevolante.net |
| notiziecorriere.it | luogocomune.net |
| senegaldirect.net | madreterra.myblog.it |
| stampalibera.net | mafia-capitale.it |
| strettoweb.com | mammainrete.blogspot.com |
| telegiornale.news | mattino.ch |
| tg-quotidiano.net | medicinenon.it |
| tg-quotidiano.org | mednat.org |
| tutto24h.info | messaggiero.com |
| tuttoilcalcio24.com | meteoweb.eu |
| tuttoinweb.com | misteriditalia.it |
| vocidallastrada.org | mondodeglianimali.altervista.org |
| zapping2017.myblog.it | mondonews1.blogspot.it |
| 24orenotizie.com | morasta.it |
| 5ideeinmovimento.blogspot.it | naturalnews.com |
| 5stellenews.com | neovitruvian.wordpress.com |
| accademiadellaliberta.blogspot.it | nessuna-censura.com |
| actiionweb.com | newapocalypse.altervista.org |
| actionweb24.com | news24italia.com |
| agenews.eu | newscronaca.it |
| aidaa-animaliambiente.blogspot.it | newsitalys.com |
| albainternazionale.blogspot.it | newstime24.altervista.org |
| alcyonpleiadi.blogspot.it | nexusedizioni.it |
| alfredolio.wordpress.com | nibiru2012.it |
| alleanzadellasalute | nocensura.com |
| all-news.tv | noinvasione.com |
| allnews24.eu | nonsiamosoli.net |
| altrarealta.blogspot.it | notixonline.com |
| anno3000.altervista.org | notixweb.com |
| appunti2008.blogspot.it | notiziaitalica.altervista.org |
| aprilamente.info | notiziarioeuropeo.altervista.org |
| assis.it | notiziariosegreto.wordpress.com |
| attaccomirato.com | notizie24h.net |
| attiviamoci.it | notiziedalpopolo.altervista.org |
| attivistam5snews.blogspot.it | notizieflash.eu |
| attivotv.it | notizieinmovimentonews.blogspot.it |
| aurorasito.wordpress.com | notizieora.it |
| autismovaccini.org | notiziepericolose.blogspot.com |
| benesserefeed.it | notiziepericolose.blogspot.it |
| benitomussolini.altervista.org | notizieregionali.com |
| blogdieles.altervista.org | notiziespericolate.com |
| blogdieles2.altervista.org | nuovamedicinagermanica.it |
| bloginmovimento.altervista.org | nwonuovoordinemondiale.wordpress.com |
| blognews24ore.com | ohmiaitalia.com |
| blogopenyoureyes.altervista.org | olivieromannucci.blogspot.it |
| breaknotizie.com | pandoratv.it |
| byoblu.com | paoloferrarocdd.blogspot.it |
| catenaumana.com | paradisefruit.altervista.org |
| centrometeoitaliano.it | perdavvero.com |
| chesuccede.it | pianetablunews.it |
| chiaveorgonica.altervista.org | pianetablunews.wordpress.com |
| clicknotizie.it | pianetax.wordpress.com |
| comedonchisciotte.org | piccolocuore.it |
| comilva.org | piovegovernoladro.info |
| compressamente.blogspot.it | politicanews.altervista.org |
| condividilo.org | presadicoscienza.altervista.org |
| conoscenzealconfine.it | questaitalia.wordpress.com |
| controinformo.altervista.org | raggioindaco.wordpress.com |
| controinformo.eu | rainews24.live |
| controinformo.info | rassegnastampa.eu |
| controinformoblog.altervista.org | realfunny.info |
| corrieredelcorsaro.it | realscience.altervista.org |
| corrieredellapera | reattivonews.com |
| corrieredelmattino | repubblica24.com |
| corrieredelmattino.altervista.org | ribelli.eu |
| corrieredisera.it | ripuliamolitalia.altervista.org |
| cortesovrana.it | riscattonazionale.org |
| coscienzaitaliana.com | rischiocalcolato.it |
| cosmofruttariano3m.altervista.org | rivoluzioneoraomaipiu.com |
| curiosandoonline.com | robadapazzi.com |
| curiosity2013.altervista.org | rollingston.altervista.org |
| curiosityalive.altervista.org | sadefenza.blogspot.it |
| cvdiariodelpollinho.altervista.org | saltoquantico.org |
| delta-leveritanascoste.blogspot.it | sapereeundovere.com |
| devinformarti.blogspot.it | saper-link-news.com |
| dionidream.com | scenarieconomici.it |
| direttainfo.blogspot.it | scienzaeconoscenza.it |
| direttanews.it | secretnews.fr |
| direttanews24.com | segnidalcielo.it |
| direttanfo.blogspot.it | segretodistato.com |
| disinformazione.it | semplicipensieri.com |
| disquisendo.wordpress.com | senzacensura.org |
| divieto.reattivonews.com | siamolagente.altervista.org |
| ecocreando.weebly.com | siamonapoletani.org |
| ecologiasociale | siamorimastisoli.com |
| ecotricolore.altervista.org | siamorimastisoli.today |
| ecplanet.org | signoraggio.it |
| effervescienza.com | silenziefalsita.it |
| essenzialmentedonna.altervista.org | sitoaurora.wordpress.com |
| essere-informati.it | skytg24news.com |
| eticamente.net | socialbuzz.it |
| europeannews.altervista.org | socialnotixweb.com |
| eurosalus.com | soloitaliani.com |
| evidenzaliena.altervista.org | sostenitori.info |
| facebooknotizia.altervista.org | sputtaniamotutti.reattivonews.org |
| fascinazione.info | stampa-lazio.com |
| filosofiaelogos.it | stopeuro.org |
| frasideilibri.com | succedenelmondo.com |
| freeondarevolution.blogspot.it | sulatestagiannilannes.blogspot.it |
| funvideosonline.info | superbamente.com |
| futuroacinquestelle.altervista | supernotizie.net |
| gazzetta24.com | tankerenemy.com |
| gazzettadellasera.com | tanker-enemy.com |
| gazzettanews24.com | tankerenemymeteo.blogspot.it |
| giornaleilsole.com | telegrafo.altervista.org |
| globo365.info | terrarealtime.blogspot.com |
| grandecocomero.com | terrarealtime2.blogspot.com |
| guarda.link | tg24h.altervista.org |
| guarda.one | tg24italia.com |
| guarireoggi.blogspot.it | tg24notizie.altervista.org |
| hackthematrix.it | tg5stelle.it |
| iconicon.it | tgcom24news.com |
| ilbazarinformazione.blogspot.it | tgnewsitalia.it |
| ilbellocheavanza.com | thecancermagazine.blogspot.it |
| ilcorriere.cloud | thetonicexpress.com |
| ilcorrieredellanotte.it | thuglifevideos.com |
| ilfarosulmondo.it | ticinolive.ch |
| ilfattaccio.org | tmcrew.org |
| ilfattodalweb.com | tuttiicriminidegliimmigrati.com |
| ilfattoquotidaino.it | tutto24.info |
| ilgiomale.myblog.it | ultimora24.it |
| il-giornale.info | ununiverso.altervista.org |
| ilgiornaleitaliano.it | ununiverso.it |
| ilgiornalenews.com | vacciniinforma.it |
| ilmattoquotidiano.it | veritanwo.altervista.org |
| ilmeglio-delweb.it | videoenotizie.it |
| ilmessagero.altervista.org | videoscoop.info |
| ilmessaggio.it | videoviraliweb.com |
| ilmeteo.it | vivoinsalute.com |
| ilmisito.blogspot.com | vnews24.it |
| ilmondodinoidonne.com | vocedelweb.com |
| ilmovimentovaavanti.alteravista.org | voxnews.info |
| ilmovimentovaavanti.altervista.org | webitalia360.com |
| ilnavigatorecurioso.it | web-news24.com |
| ilnord.it | webnotice.altervista.org |
| ilnotiziario24.com | webtg24.com |
| ilnuovomondodanielereale.blogspot.it | worldnewsdailyreport.com |
| ilpopulista.it | wwwblogdicristian.blogspot.it |
| ilprimatonazionale.it | younetspiegalevele.altervista.org |
| ilpuntosulmistero.it | younetspiegalevele.info |
| ilquotidaino.wordpress.com | yournewswire.com |
| il-quotidiano.info | zonagrigianews.com |

#

#

#

# **Appendix 2. blacklist of problematic Facebook entities signaled by Avaaz**

| 5Stelle TV | La Gazzetta della Sera By KontroKultura |
| --- | --- |
| Adesso Basta | La pagina eventi |
| Adesso Basta! Movimento Italiano Contro La Politica Corrotta! | La Repubblica Del Cazzeggio |
| Adesso Italia | La Verità ci Rende Liberi – Il Risveglio |
| Affari condivisi | La voce dell’Italia Onesta. |
| Amici di Beppe Grillo | Lega – Salvini premier News |
| Amici di Gianroberto Casaleggio | Leggilo.Org |
| Anonymous attivisti | Liberi e Indipendenti |
| Beautiful exotic | M5S \ LEGA |
| CheMusica & News | M5s- Attivisti Blasonati |
| CheNews e Viaggi. | M5S InSide |
| CheVideo24.org | Ma Anche No |
| Conte il Premier Populista | Mafia Capitale |
| Corriere della notizia | Mafia Capitales |
| Curiosauro | MANDIAMO A CACARE L’EUROPA |
| Daniele Ferrari Attivista M5S | Mondo Sporco |
| Di Maio Conte Ministri del popolo | NERO Dentro |
| Di Matteo-Morra-Gratteri fans Club | Nessuno di loro |
| Dimissioni dei razzisti del Pd | Notizie in Movimento |
| DonneA5Stelle | Notizie Lega Nord |
| E Sti Cazzi | Pianetablunews |
| Fans club di Alessandro Di Battista | Piu’siamo PIU’ Rumore Facciamo” |
| Fascinazione | Politici Corrotti, confisca dei beni e carcere |
| Forza Popolare | Politici Mafiosi |
| Fronte dei Popoli | Prima aiutiamo gli Italiani poi si vede. – Movimento Adesso Italia |
| Fronte del Popolo. Contributi e Dibattito. | Quel che non sai |
| Gli Attivisti Cambiano il Mondo | Rassegne Italia |
| Gossip e Cucina | Rimani Informato |
| Governo Del Cambiamento | Riprendiamoci La Patria |
| Governo Giallo- Verde Al Servizio Del Paese | Riscatto Nazionale |
| Grande Cocomero Classic | Salute e Alimentazione |
| Grillino a mia insaputa | Salute Eco Bio |
| II Riscatto Nazionale | Salvini quasi simile. a Mosè. HA ridato al popolo la forza |
| IL PD | Segreto di Stato |
| Informazione Alternativa | Stelle di Vita |
| IO SONO populista | Travaglio fans club |
| IO SOSTENGO ADESSO ITALIA | UFO e Alieni le Verita’ Nascoste |
| Italia Patria Mia | Un’Italia senza Renzusconi – fan club. |
| Italia Sovrana e fuori dall’Europa | Vera Informazione |
| Italia uguale Dittatura | ViaggiNews e Sentimenti |
| Jeda News | Virus5Stelle |
| Kontrokultura | Viva La Patria |
| L’Angolo della Risata | YouMovies.it |
| L’attivista a 5 stelle | |
